# Supplementary material
Source: PubMed Central journal article supplement (PMC4652097)

Table S1: Reference strains of *H. parasuis* from the IHA serotyping scheme, which were used for the optimisation of the serotyping multiplex.

| Strain Name            | LoLa ID | Clinical background | Serovar by IHA | Country of origin |
|------------------------|---------|---------------------|----------------|-------------------|
| <b>No.4</b>            | HS371   | Non-clinical        | 1              | Unknown           |
| <b>SW140-Den</b>       | HS372   | Non-clinical        | 2              | Japan             |
| <b>SW114-Den</b>       | HS373   | Non-clinical        | 3              | Japan             |
| <b>SW124</b>           | HS374   | Non-clinical        | 4              | Japan             |
| <b>Nagasaki-Den</b>    | HS375   | Unknown             | 5              | Switzerland       |
| <b>131</b>             | HS376   | Non-clinical        | 6              | Switzerland       |
| <b>174-Den</b>         | HS377   | Unknown             | 7              | Sweden            |
| <b>C5-Den</b>          | HS378   | Unknown             | 8              | Sweden            |
| <b>D74-Den</b>         | HS379   | Unknown             | 9              | Germany           |
| <b>H555</b>            | HS370   | Unknown             | 10             | Japan             |
| <b>H465-Den</b>        | HS380   | Unknown             | 11             | Germany           |
| <b>H425</b>            | HS381   | Clinical            | 12             | Germany           |
| <b>IA-84-17975-Den</b> | HS382   | Unknown             | 13             | USA               |
| <b>IA-84-22113</b>     | HS306   | Clinical            | 14             | USA               |
| <b>SD-84-15995</b>     | HS301   | Clinical            | 15             | USA               |

Figure S1: Gene composition of the capsule loci for the fifteen reference strains with potential serovar specific genes highlighted and the final chosen genes (adapted from Howell et al. 2013).

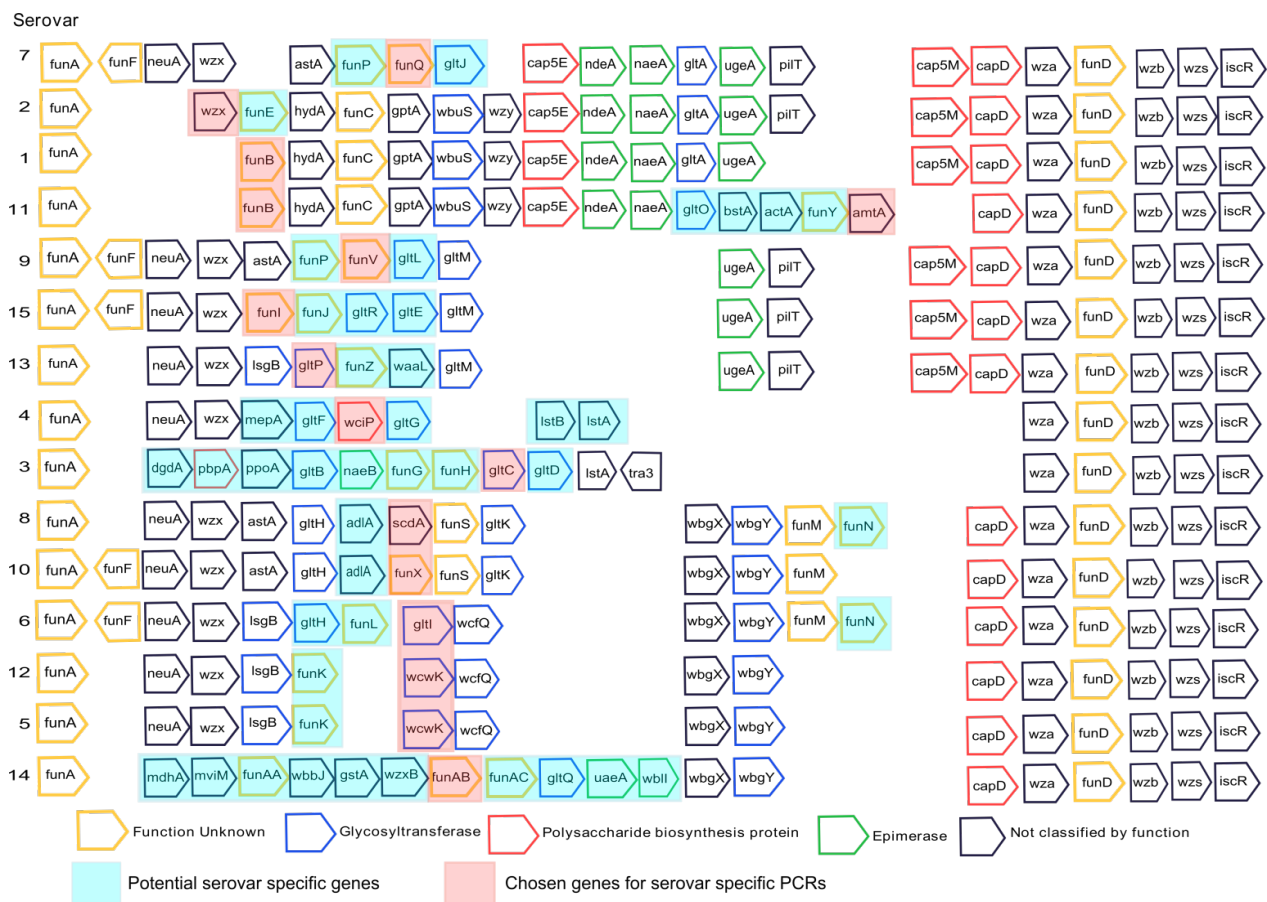

Supplement: JCM.01991-15_zjm999094626so1.pdf [file JCM.01991-15_zjm999094626so1.pdf]
